# Supplementary material
Source: MDPI journal article supplement (https://www.mdpi.com/2079-9284/10/1/22)
Supplement: s1 [file s1 › cosmetics-2116391-supplementary.pdf]

## Supporting Information

### The effect of cosmetic ingredients of phenol type on immediate pigment darkening and their (photo)protective action in association with melanin pigmentation: a model study

| Table of contents                                                                                                                                                                                                                                                                 |      |
|-----------------------------------------------------------------------------------------------------------------------------------------------------------------------------------------------------------------------------------------------------------------------------------|------|
| <b>Figure S1.</b> Dose-response curves of linoleic acid photooxidation for Paradol-6 and ginger CO <sub>2</sub> extract in the RF sensitized reaction (a, b) and for Paradol-6, ginger CO <sub>2</sub> extract and phenylethyl resorcinol in the RB sensitized process (c, d, e). | p. 1 |
| <b>Figure S2.</b> Dose-response curves of linoleic acid photooxidation for RF sensitized process using Paradol-6 or ginger CO <sub>2</sub> extract in the presence of 0.05 mg/mL DHI-mel (a, b) or 0.0125 mg/mL DHICA-mel (c, d).                                                 | p. 2 |
| <b>Figure S3.</b> Comparative evaluation of lipid peroxidation by diene formation monitoring at 234 nm and hydroperoxide measurement by FOX assay.                                                                                                                                | p. 3 |
| <b>Figure S4.</b> Effect of 2-aminobenylbenzoic acid (20 µM) on photoinduced peroxidation of a 250 µM suspension of liposomes containing 20 µM RB and/or 0.05 mg/mL DHI-mel.                                                                                                      | p. 4 |
| <b>Figure S5.</b> Dose-response curves for Paradol-6, ginger CO <sub>2</sub> extract and phenylethyl resorcinol in thymine photoirradiation.                                                                                                                                      | p. 5 |
| <b>Figure S6.</b> Effect of Paradol-6 and ginger CO <sub>2</sub> extract on thymine consumption by photoirradiation in the presence and in the absence of DHI- or DHICA-mel (0.05 and 0.004 mg/mL, respectively).                                                                 | p. 6 |
| <b>Figure S7.</b> Residual thymine expressed as percent compared to control after irradiation with the solar simulator in the presence of CIs at 50 µM and RF 50 µM over 30 min.                                                                                                  | p. 7 |

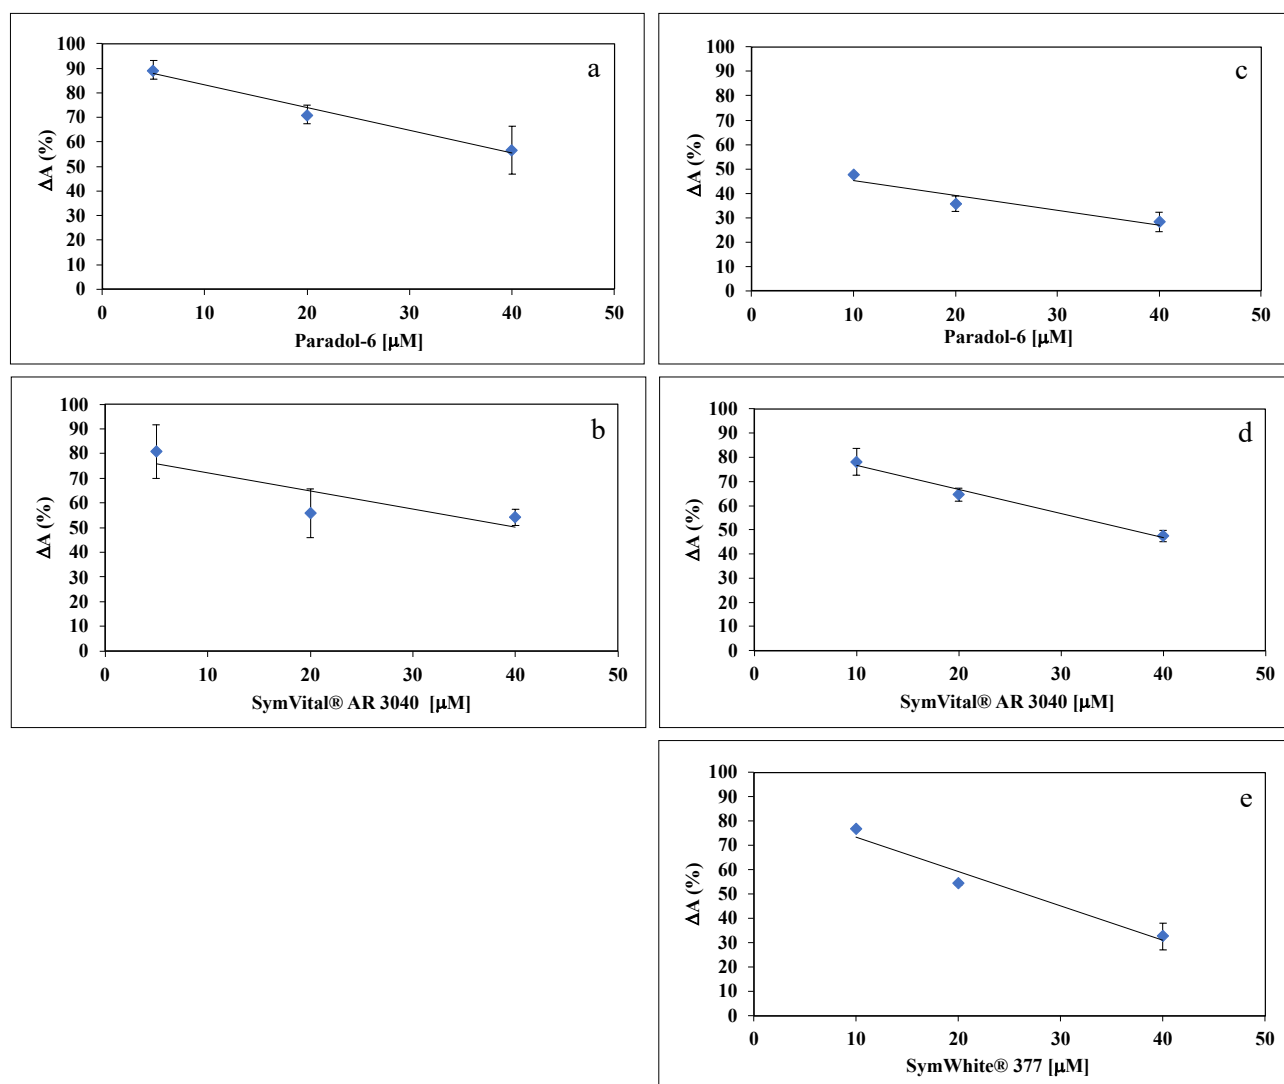

**Figure S1.** Dose-response curves of linoleic acid photooxidation for Paradol-6 and ginger CO<sub>2</sub> extract in the RF sensitized (a, b) and for Paradol-6, ginger CO<sub>2</sub> extract and phenylethyl resorcinol in the RB sensitized process (c, d, e). Data are expressed as mean  $\pm$  SD of three independent experiments, each performed in duplicate.

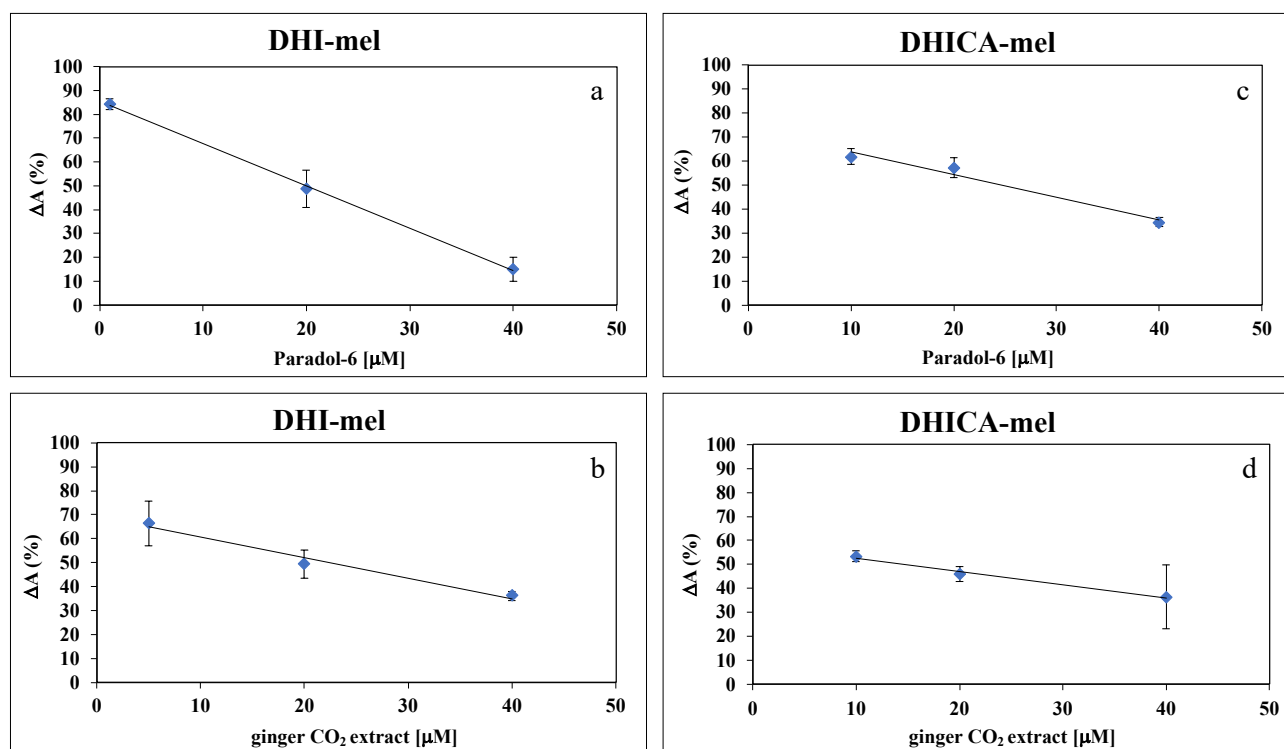

**Figure S2.** Dose-response curves of linoleic acid photooxidation for RF sensitized process using Paradol-6 or ginger CO<sub>2</sub> extract in the presence of 0.05 mg/mL DHI-mel (a, b) or 0.0125 mg/mL DHICA-mel (c, d). Data are expressed as mean  $\pm$  SD of three independent experiments, each performed in duplicate.

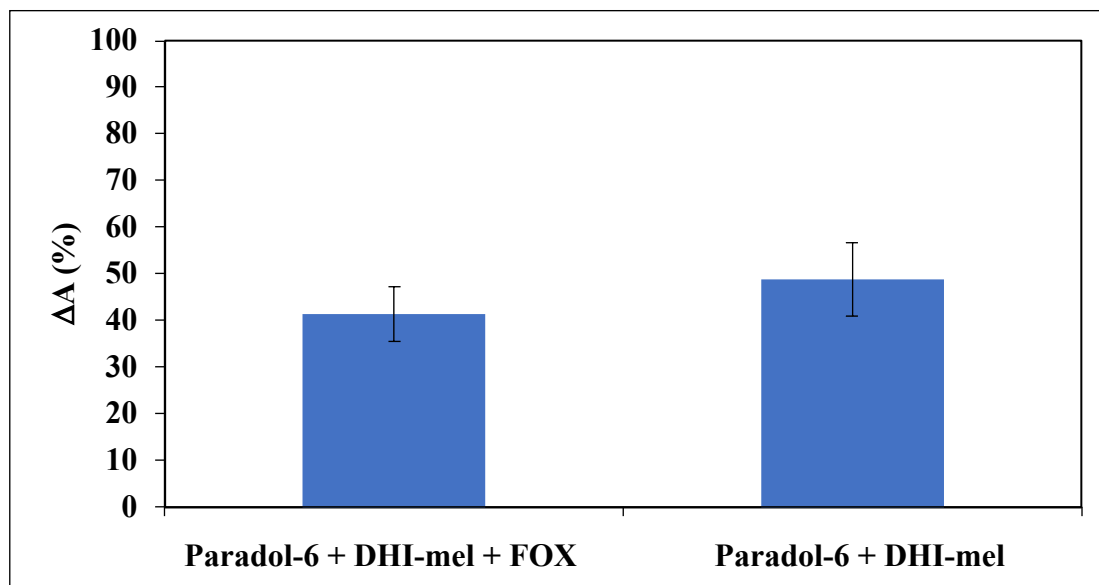

**Figure S3.** Comparative evaluation of lipid peroxidation by monitoring diene formation at 234 nm and hydroperoxide measurement by FOX assay. Data are expressed as mean  $\pm$  SD of three independent experiments, each performed in duplicate.

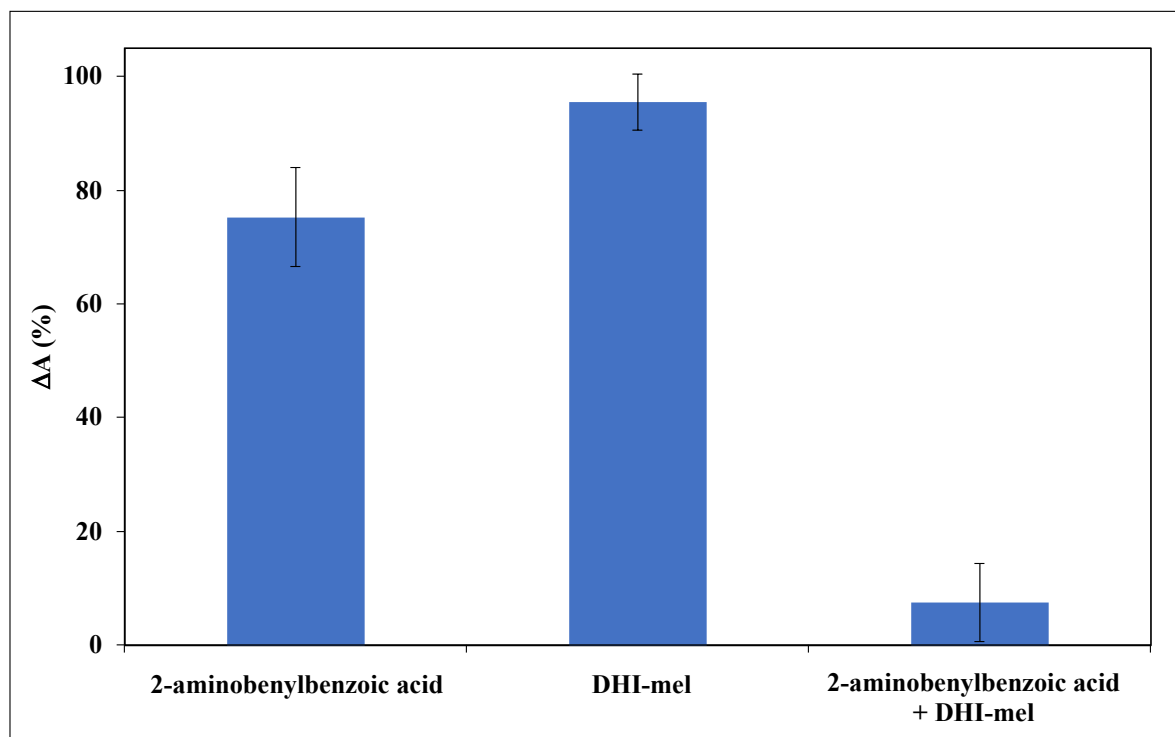

**Figure S4.** Effect of 2-aminobenylbenzoic acid (20  $\mu$ M) on photoinduced peroxidation of a 250  $\mu$ M suspension of liposomes containing 20  $\mu$ M RB and/or 0.05 mg/mL DHI-mel. Data are expressed as mean  $\pm$  SD of three independent experiments, each performed in duplicate.

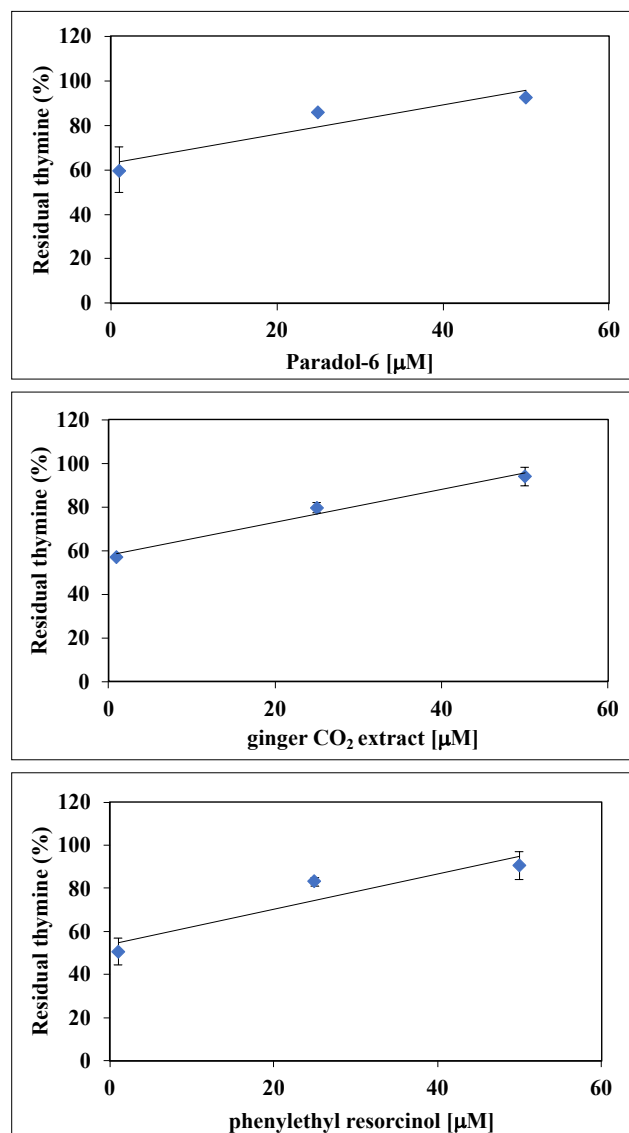

**Figure S5.** Dose-response curves for Paradol-6, ginger CO<sub>2</sub> extract and phenylethyl resorcinol in thymine photoirradiation. Data are expressed as mean  $\pm$  SD of three independent experiments, each performed in duplicate.

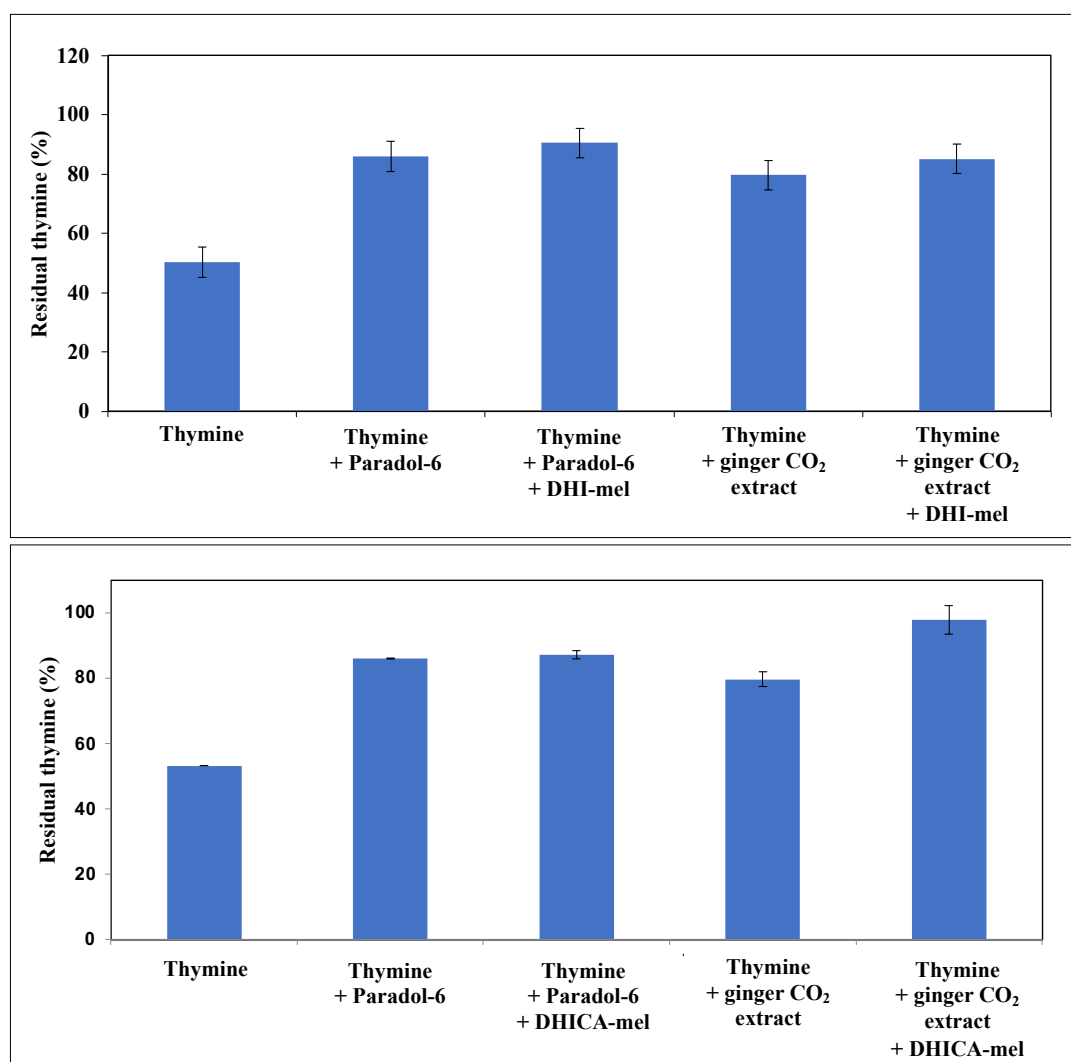

**Figure S6.** Effect of Paradol-6 and ginger CO<sub>2</sub> extract on thymine photoirradiation in the presence and in the absence of DHI- or DHICA-mel (0.05 and 0.004 mg/mL, respectively). Data are expressed as mean  $\pm$  SD of three independent experiments, each performed in duplicate.

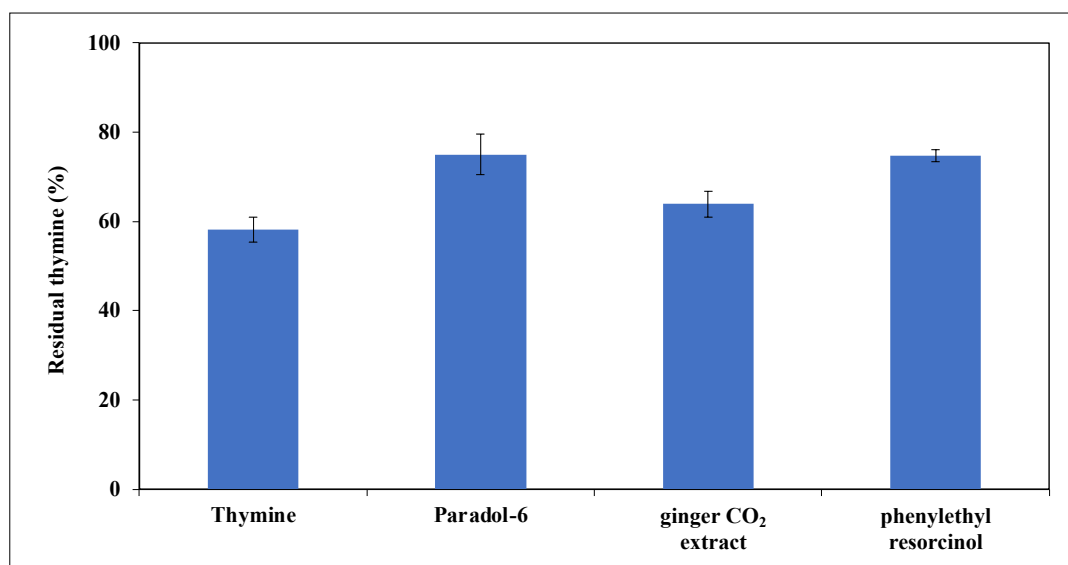

**Figure S7.** Residual thymine expressed as percent compared to control after irradiation with the solar simulator in the presence of CIs at 50  $\mu$ M and RF 50  $\mu$ M over 30 min. Data are expressed as mean  $\pm$  SD of three independent experiments, each performed in duplicate.
